# Supplementary material for: Leach-resistant Pt nanoparticles on a silica support serving as a clean, efficient, and recyclable catalyst for solvent-free hydrosilylation
Source: Royal Society of Chemistry journal article supplement (doi:10.1039/d1gc02759j), 2021-01-01
Supplement: d1gc02759j1.pdf [file d1gc02759j1.pdf]

## Supporting Information

### **Leach-resistant Pt nanoparticles on a silica support serving as a clean, efficient, and recyclable catalyst for solvent-free hydrosilylation**

Srinivas Komati,<sup>a</sup> Kenrick M. Lewis,<sup>b</sup> Debarshi Dasgupta,<sup>a</sup> Kalyanachakravarthi Kothapalli,<sup>a</sup>

Abirami Srikanth,<sup>a</sup> Alok Sarkar<sup>\*a</sup>

*<sup>a</sup>Corporate R&D Center, Momentive Performance Materials Inc., Survey No. 09, Hosur Road, Electronic City (West), Bangalore 560100, India.*

*<sup>b</sup>Momentive Performance Materials Inc., 769 Old Saw Mill River Road, Tarrytown, NY 10591, USA.*

#### **CONTENTS:**

- 1. Tables**
- 2. Figures**
- 3. NMR Data**

**Table S1.** Details of sample digestion using CEM Microwave.

| Stage | Max Power | % Power | Ramp (min) | PSI (control) | °C (control) | Hold (min) |
|-------|-----------|---------|------------|---------------|--------------|------------|
| 1     | 400 W     | 25      | 5          | 500           | 50           | 3          |
| 2     | 400 W     | 50      | 5          | 500           | 100          | 3          |
| 3     | 400 W     | 75      | 5          | 500           | 150          | 3          |
| 4     | 400 W     | 100     | 5          | 500           | 200          | 30         |

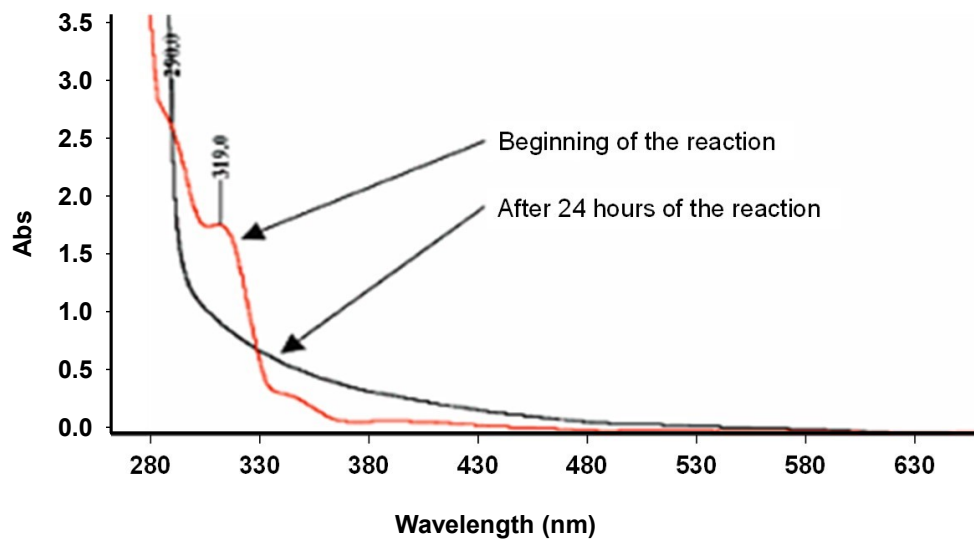

**Figure S1:** UV-vis spectra of the reaction mixture before and after reduction of  $\text{Me}_2\text{Pt}(\text{COD})$

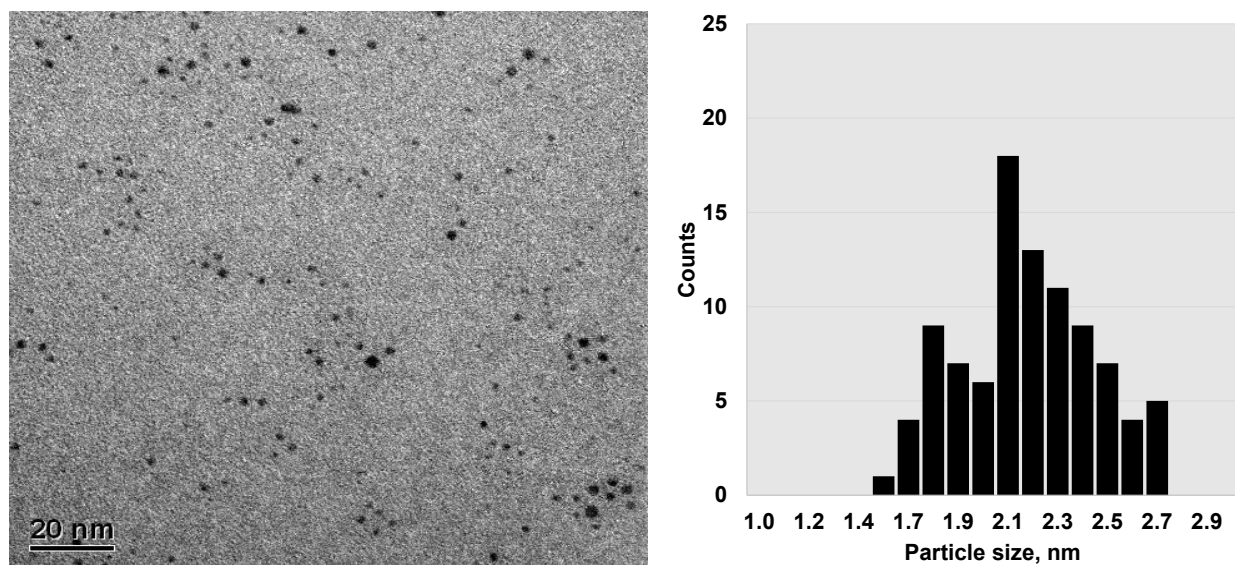

**Figure S2:** TEM image of the solution after 24 hour after the reduction of  $\text{Me}_2\text{Pt}(\text{COD})$ .

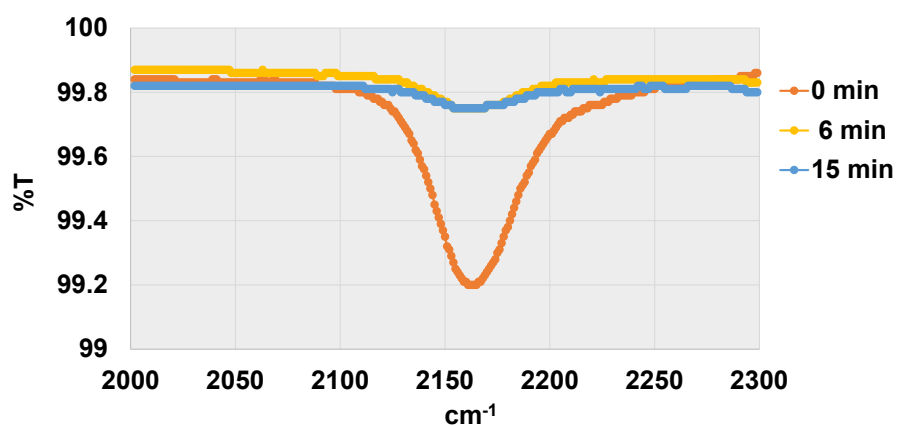

**Figure S3:** FTIR peak for Si-H of polysiloxane stabilized Pt nanoparticle solution at 0, 6 and 15 min of aerial oxidation.

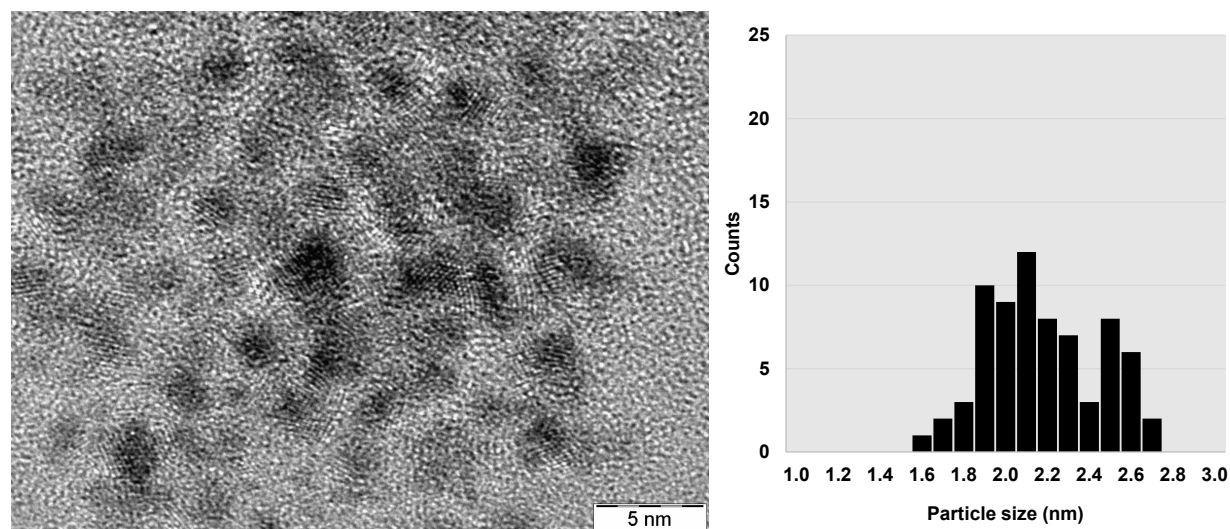

**Figure S4:** HRTEM image and particle size analysis of Pt@PDMS@vinyl-modified silica.

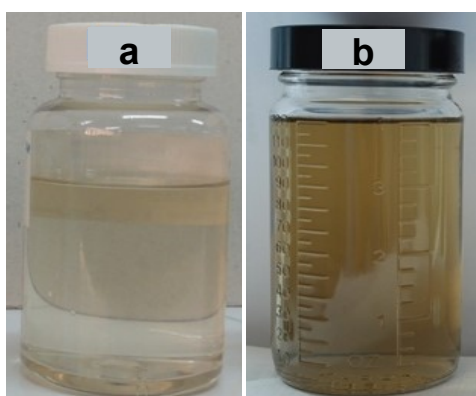

**Figure 5S:** The appearance of Silicone polyether obtained by (a) Pt@PDMS@vinyl-modified silica (B) CPA catalyst

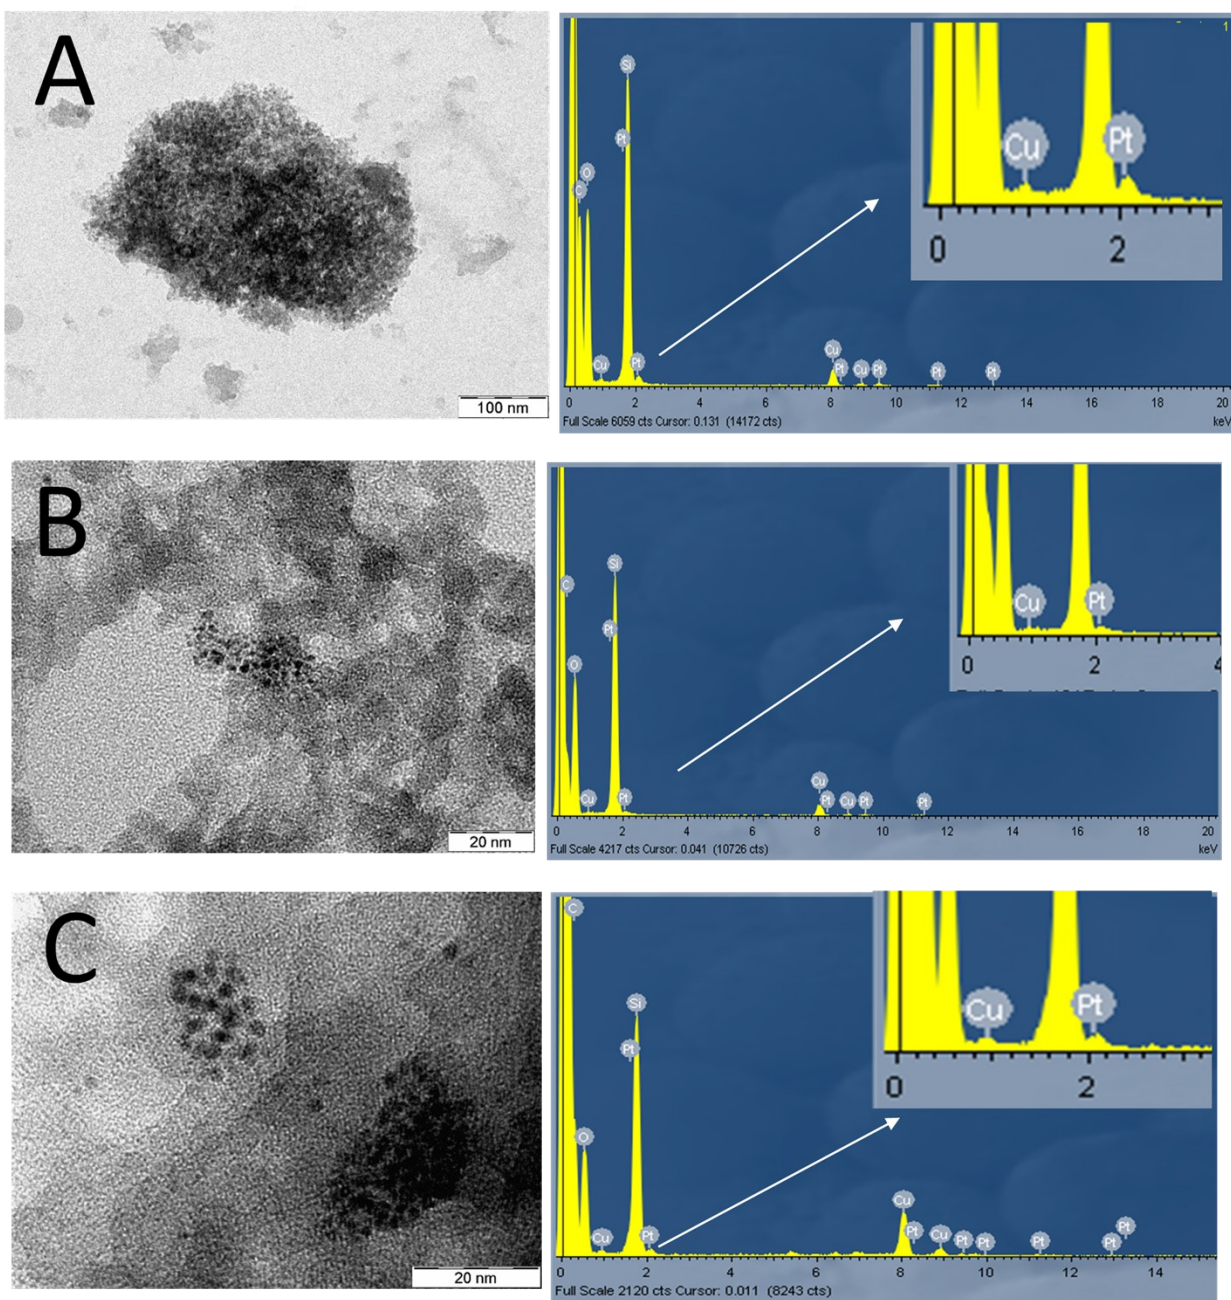

**Figure S6:** Energy Dispersive Spectroscopy (EDS) data for Pt@PDMS@vinyl-modified silica at different location, A, B and C on the grid. (Signal of Cu comes of the TEM grid)

## **Comparative Study for catalytic activity of Pt@PDMS@vinyl-modified silica against Pt@SBA-15.**

The hydrosilylation of 1-octene with polymethylhydrosiloxane (PMHS) containing about 40 Si-H units was used for activity comparison of the present Pt nanoparticle catalyst with previously reported catalyst, Pt@SBA-15.<sup>1</sup> A three-necked flask equipped with a magnetic stirrer, reflux condenser, a thermometer was then loaded with PMHS (2.0 mmol, 4.46g) and the catalyst powder (0.042 g, 6 ppm of Pt). The suspension was preheated at 75 °C, and 1-octene (9.6 g, 1.2 equivalent of 1-octene vs. SiH) was added dropwise over a period of 30 minutes under a constant stirring at 200 RPM. Afterward, the reaction was monitored by <sup>1</sup>H NMR where the 98% Si-H conversion was indicated after 8 hours. Under identical reaction conditions, the earlier reported catalyst, Pt@SBA-15 is reported to give only 70% conversion in 8 hours. <sup>1</sup>H NMR (400MHz, CDCl<sub>3</sub>) δ 0.05-0.25 (m, 126H), δ 0.55 (m, 72H), δ 0.90 - 1.30 (m, 540H).

## **NMR Data for hydrosilylation products.**

### **Heptamethyl(octyl)trisiloxane.** (Entry 1-3, Table 1)

<sup>1</sup>H NMR (400MHz, CDCl<sub>3</sub>) δ -0.10 (s, 3H), 0.0 (s, 18H), 0.48 (m, 2H), 0.80 (t, 3H, *J*=8.8 Hz), 1.20 (m, 12H).

### **Heptamethyl (3-glycidyloxypropyl)trisiloxane.** (Entry 4, Table 1)

<sup>1</sup>H NMR (400MHz, CDCl<sub>3</sub>) δ -0.10 (s, 3H), 0.0 (s, 18H), 0.39 (m, 2H), 1.50 (m, 2H), 2.50 (m, 1H), 2.7 (t, 1H), 3.08 (m, 1H), 3.24 (m, 3H), 3.59 (m, 1H).

### **Polyether functionalized trisiloxane** ( Entry 5, Table 1)

<sup>1</sup>H NMR (400MHz, CDCl<sub>3</sub>) δ 0.05 (m, 21H), 0.39 (m, 2H), 1.56 (m, 2H), 3.30 (s, 3H), 3.6 (m, 30H).

### **Octyl terminated polydimethylsiloxane.** (Entry 1, Table 2)

<sup>1</sup>H NMR (400MHz, CDCl<sub>3</sub>) δ 0.01 (s, 120H), 0.48 (m, 4H), 0.80 (m, 6H), 1.23 (m, 24H).

### **4-ethylcyclohexyl-1, 2-epoxide terminated polydimethylsiloxane.** (Entry 2, Table 2)

<sup>1</sup>H NMR (400MHz, CDCl<sub>3</sub>) δ 0.01 (s, 588 H), 0.39 (m, 4H), 1.12 (m, 4H), 1.38 (s, 6H), 1.5-2.13 (m, 8H), 3.06 (m, 4H).

**Polyether terminated polydimethylsiloxane.** (Entry 3, Table 2)

$^1\text{H}$  NMR (400MHz,  $\text{CDCl}_3$ )  $\delta$  -0.03 (m, 120H), 0.44 (m, 4H), 1.53 (m, 4H), 3.57 (m, 60H).

$^{29}\text{Si}$  NMR (100MHz;  $\text{CDCl}_3$ ) 7.5, -22.1.

**Eugenol terminated polydimethylsiloxane.** (Entry 4, Table 2)

$^1\text{H}$  NMR (400MHz,  $\text{CDCl}_3$ )  $\delta$  0.00 (m, 588H), 0.50 (m, 4H), 1.52 (m, 4H), 2.47 (m, 4H), 3.25 (s, 6H), 6.6-6.8 (m, 6H).

$^{29}\text{Si}$  NMR (100MHz;  $\text{CDCl}_3$ ) 7.6, -21.8.

**3-propyloxy 1,2 propanediol terminated polydimethylsiloxane.** (Entry 5, Table 2)

$^1\text{H}$  NMR (400MHz,  $\text{CDCl}_3$ )  $\delta$  -0.02 (m, 120H), 0.45 (m, 4H), 1.54 (m, 4H), 3.35-3.96 (m, 14H).

$^{29}\text{Si}$  NMR (100MHz;  $\text{CDCl}_3$ ) 7.6, -21.9.

**Silyl undecanoate terminated polydimethylsiloxane.** (Entry 6, Table 2)

$^1\text{H}$  NMR (400MHz,  $\text{CDCl}_3$ )  $\delta$  0.05 (m, 588H), 0.20 (s, 3H), 0.51 (m, 4H), 1.2 (m, 28H), 1.5 (m, 8H), 2.25 (t, 4H).

$^{29}\text{Si}$  NMR (100MHz;  $\text{CDCl}_3$ ) 22.6, 7.6, -22.0.

References:

1. T. Galeandro-Diamant, R. Sayah, M. -L. Zanota, S. Marrot, L. Veyre, C. Thieuleux, V. Meille. *Chem. Commun.*, 2017, **53**, 2962-2965.
